# Supplementary material for: Field-Oriented Assessment of Bovine Tuberculosis in Tunisian Cattle: IDR, PCR Mpb70 and serological Test prediction based on AI approaches
Source: Research Square preprint supplement (doi:10.21203/rs.3.rs-6938317/v1), 2025-06-25
Supplement: Supplementary file 1 [file 58a4bfed521a58370113b9ec.docx]

**Molecular Detection of *M. bovis* via Mpb70 Gene Amplification by PCR from Blood Samples**


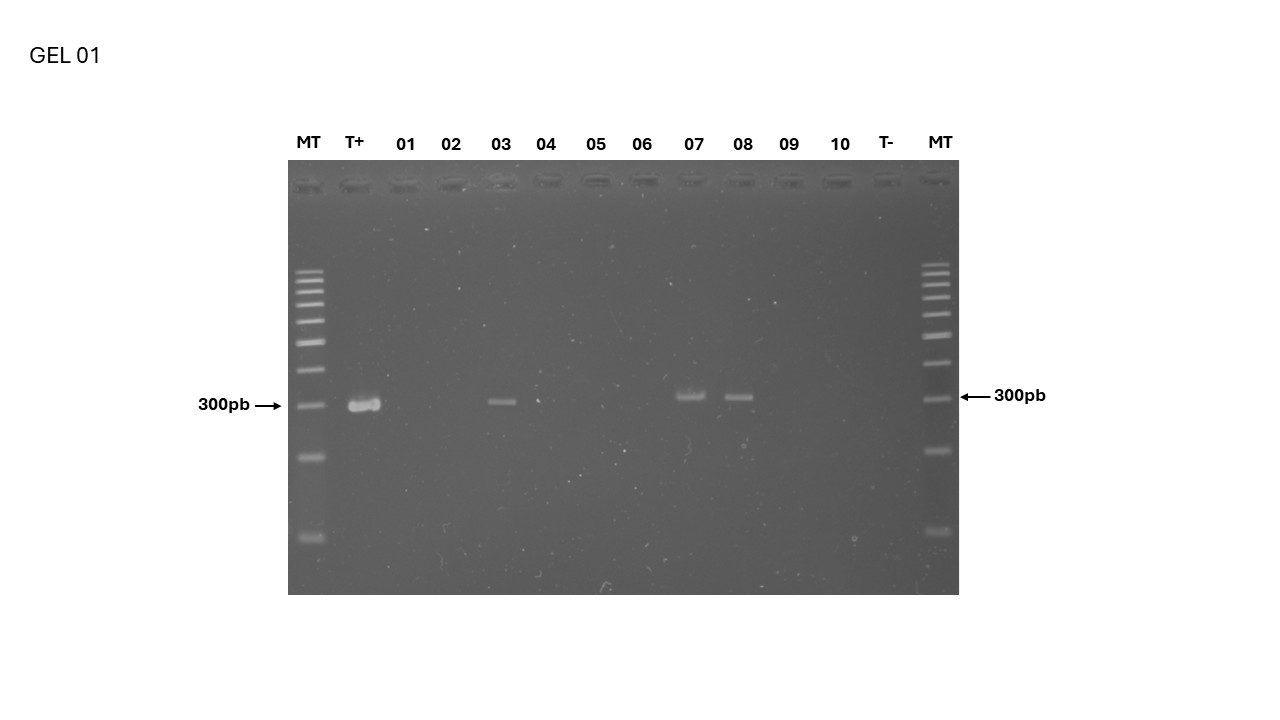


**Figure SIII (1):** Agarose gel electrophoresis of PCR-amplified Mpb70 gene from *Mycobacterium bovis* in bovine blood samples. 2% agarose gel stained with ethidium bromide and visualized under UV light. **MT:** DNA ladder (Thermo Scientific™ GeneRuler™100 pb DNA Ladder). **T+:** Positive control (*M. bovis* strain DNA). **Lanes 03, 07, and 08** show positive amplification.


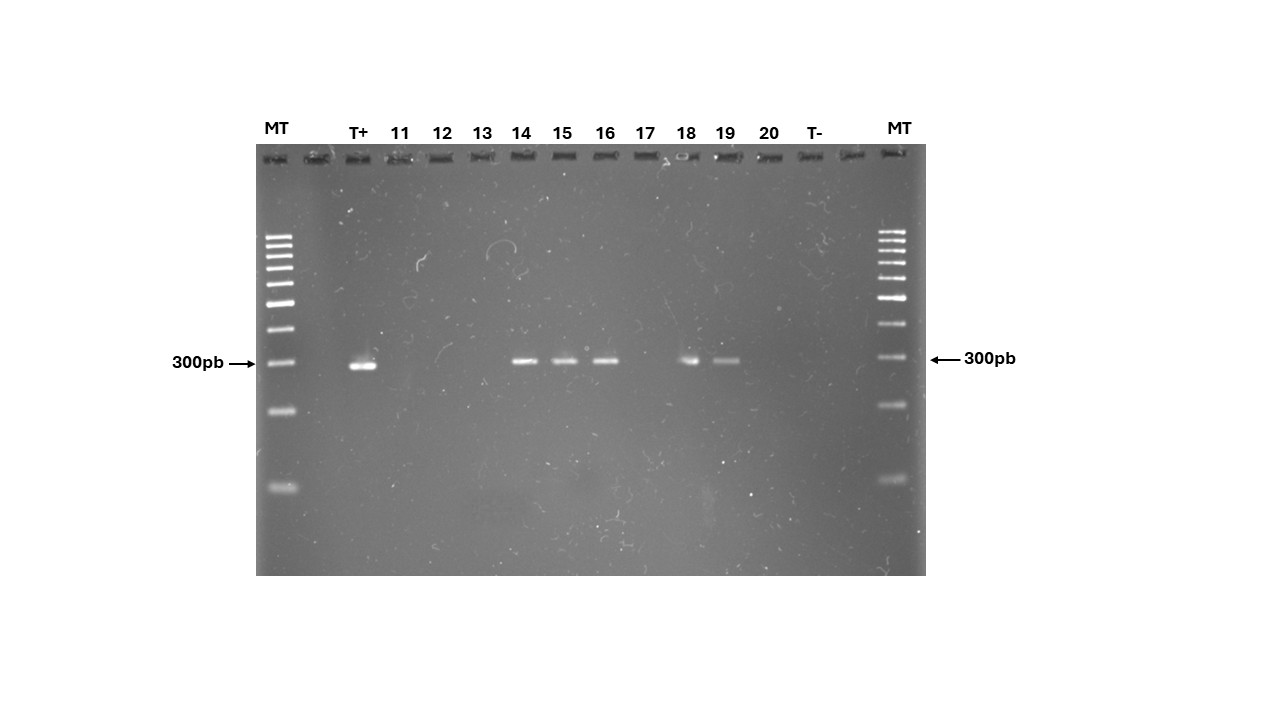


**Figure SIII (2) :** Agarose gel electrophoresis of PCR-amplified Mpb70 gene from *Mycobacterium bovis* in bovine blood samples. 2% agarose gel stained with ethidium bromide and visualized under UV light. **MT:** DNA ladder (Thermo Scientific™ GeneRuler™100 pb DNA Ladder). **T+:** Positive control (*M. bovis* strain DNA). **Lanes 14, 15, 16, 18 and 19** show positive amplification.


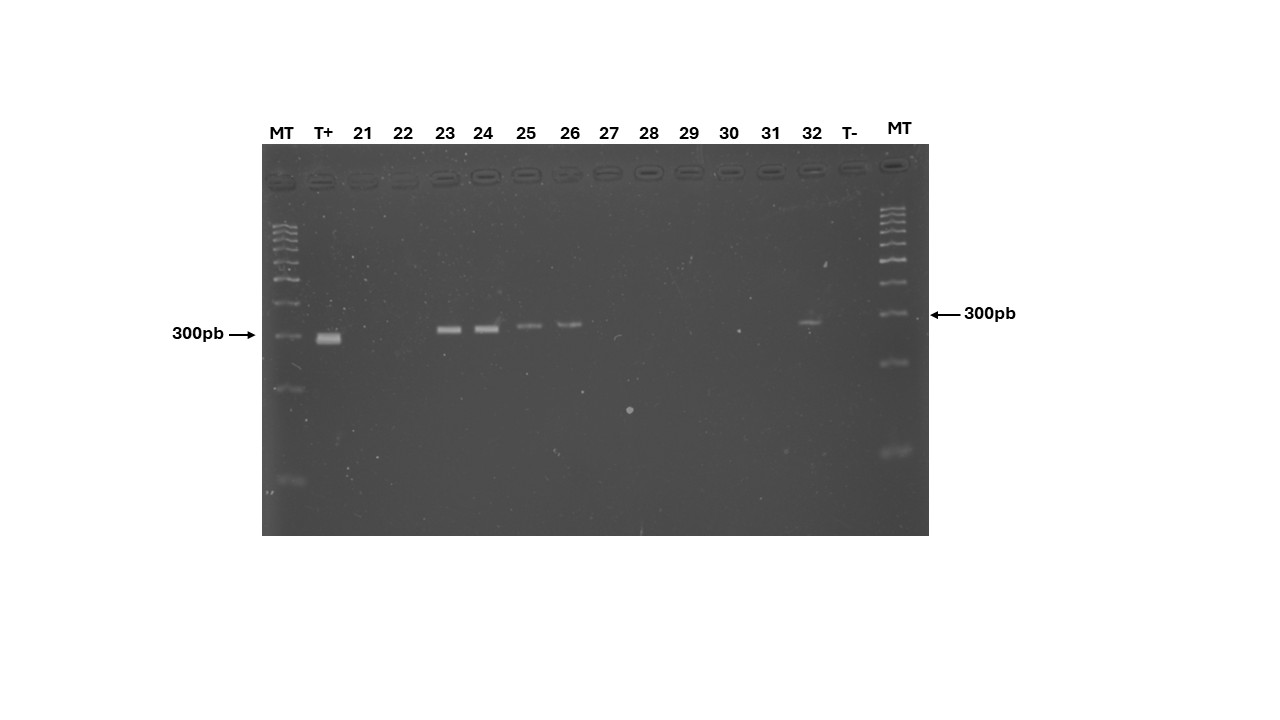


**Figure SIII (3) :** Agarose gel electrophoresis of PCR-amplified Mpb70 gene from *Mycobacterium bovis* in bovine blood samples. 2% agarose gel stained with ethidium bromide and visualized under UV light. **MT:** DNA ladder (Thermo Scientific™ GeneRuler™100 pb DNA Ladder). **T+:** Positive control (*M. bovis* strain DNA). **Lanes 23, 24, 25, 26 and 32** show positive amplification.
