# Supplementary material for: Field-Oriented Assessment of Bovine Tuberculosis in Tunisian Cattle: IDR, PCR Mpb70 and serological Test prediction based on AI approaches
Source: Research Square preprint supplement (doi:10.21203/rs.3.rs-6938317/v1), 2025-06-25
Supplement: Supplementary file 2 [file 97ab539aac328f8f386c53ea.docx]

**The intervals of AUC values used to classify the type of diagnostic interpretation**

**Table SII.** Diagnostic Performance Categories According to Area Under the Curve (AUC) Values

| **AUC Range** | **Diagnostic Interpretation** |
| --- | --- |
| 0.90–1.00 | Excellent |
| 0.80–0.89 | Good |
| 0.70–0.79 | Fair to Good |
| 0.60–0.69 | Fair / Moderate |
| 0.50–0.59 | Poor (No better than chance) |
