# Supplementary material for: Field-Oriented Assessment of Bovine Tuberculosis in Tunisian Cattle: IDR, PCR Mpb70 and serological Test prediction based on AI approaches
Source: Research Square preprint supplement (doi:10.21203/rs.3.rs-6938317/v1), 2025-06-25
Supplement: Supplementary file 3 [file db17952f7f40851150b6db8c.xlsx]

## Sheet: BLCM_results_summary_analysis 
Test	Sensitivity	Specificity	Youden_Index
Test_1_(IDR1)	0.427222	0.561905	-0.0108736
Test_2_(IDR2)	0.432469	0.565854	-0.00167736
Test_1_(IDR1)	0.39699	0.555026	-0.0479838
Test_3_(Ac1)	0.606915	0.450148	0.0570622
Test_1_(IDR1)	0.407672	0.574574	-0.0177546
Test_4_(Ac2)	0.496845	0.500281	-0.00287421
Test_1_(IDR1)	0.409111	0.5826	-0.00828939
Test_5_(Ag)	0.489424	0.49053	-0.0200459
Test_1_(IDR1)	0.427171	0.59464	0.021811
Test_6_(PCR)	0.452968	0.534996	-0.0120364
Test_2_(IDR2)	0.411273	0.580564	-0.00816262
Test_3_(Ac1)	0.571705	0.401499	-0.026796
Test_2_(IDR2)	0.41586	0.594406	0.010266
Test_4_(Ac2)	0.516012	0.51049	0.0265016
Test_2_(IDR2)	0.412707	0.57976	-0.0075333
Test_5_(Ag)	0.50728	0.497071	0.0043517
Test_2_(IDR2)	0.440528	0.574755	0.0152827
Test_6_(PCR)	0.493357	0.525481	0.0188384
Test_3_(Ac1)	0.587169	0.423166	0.0103347
Test_4_(Ac2)	0.496152	0.519913	0.0160653
Test_3_(Ac1)	0.454918	0.314418	-0.230663
Test_5_(Ag)	0.353827	0.416698	-0.229475
Test_3_(Ac1)	0.579142	0.401577	-0.0192816
Test_6_(PCR)	0.442851	0.539601	-0.0175476
Test_4_(Ac2)	0.504417	0.497973	0.00238994
Test_5_(Ag)	0.506814	0.499893	0.0067069
Test_4_(Ac2)	0.511102	0.495913	0.00701487
Test_6_(PCR)	0.467066	0.546959	0.0140248
Test_5_(Ag)	0.502894	0.494705	-0.00240138
Test_6_(PCR)	0.459432	0.545908	0.00534028

## Sheet: Feuil1
Test	Sensitivity	Specificity	Youden_Index	Mean Younden Index
Test_1_(IDR1)	0.427222	0.561905	-0.0108736	-0.0062755
Test_2_(IDR2)	0.432469	0.565854	-0.00167736
Test_1_(IDR1)	0.39699	0.555026	-0.0479838	0.00453919
Test_3_(Ac1)	0.606915	0.450148	0.0570622
Test_1_(IDR1)	0.407672	0.574574	-0.0177546	-0.0103144
Test_4_(Ac2)	0.496845	0.500281	-0.00287421
Test_1_(IDR1)	0.409111	0.5826	-0.00828939	-0.0141676
Test_5_(Ag)	0.489424	0.49053	-0.0200459
Test_1_(IDR1)	0.427171	0.59464	0.021811	0.00488728
Test_6_(PCR)	0.452968	0.534996	-0.0120364
